# Supplementary material
Source: publisher figshare collection journal article supplement (https://diabetesjournals.figshare.com/ndownloader/files/28051818)
Supplement: Supplementary file 1 [file 28051818]

**Online-only supplemental material.**

**Table S1.** Percent of patients with diabetic ketoacidosis by age at hospital admission among patients with diabetes hospitalized with COVID-19 in the United States, March–November, 2020.

| Age (yrs) | T1DM |                  |       | T2DM |                  |         |
|-----------|------|------------------|-------|------|------------------|---------|
|           | DKA  | % (95% CI)       | Total | DKA  | %                | Total   |
| 0–17      | 53   | 74.6 (63.1–83.5) | 71    | 14   | 24.6 (14.9–37.6) | 57      |
| 18–39     | 383  | 54.9 (51.2–58.6) | 697   | 482  | 9.7 (8.9–10.5)   | 4,994   |
| 40–49     | 96   | 33.1 (27.9–38.7) | 290   | 596  | 6.1 (5.6–6.6)    | 9,832   |
| 50–64     | 120  | 27.6 (23.6–32.0) | 435   | 1301 | 3.8 (3.6–4.0)    | 33,918  |
| 65–74     | 22   | 11.0 (7.3–16.2)  | 200   | 682  | 2.3 (2.1–2.5)    | 29,973  |
| ≥75       | 16   | 10.3 (6.4–16.1)  | 156   | 430  | 1.3 (1.2–1.5)    | 32,069  |
| Total     | 690  | 37.3 (35.1–39.5) | 1,849 | 3505 | 3.2 (3.1–3.3)    | 110,843 |

Abbreviations: CI = confidence interval; DKA = diabetic ketoacidosis; T1DM = type 1 diabetes mellitus; T2DM = type 2 diabetes mellitus

**Table S2.** Adjusted absolute risk and odds ratios for intensive care unit/mechanical ventilation among 269,674 patients hospitalized with COVID-19 in the United States, March–November, 2020.

|                            | Risk Ref (95% CI) | Risk T1DM (95% CI) | OR (95% CI)       | p-value |
|----------------------------|-------------------|--------------------|-------------------|---------|
| <b>ICU/MV</b>              |                   |                    |                   |         |
| <b>T1DM (Ref. no DM)</b>   |                   |                    |                   |         |
| Model Set 0                | 0.44 (0.41–0.46)  | 0.60 (0.57–0.63)   | 1.96 (1.77–2.17)  | <0.001  |
| Model Set 1*               | 0.44 (0.41–0.46)  | 0.65 (0.62–0.68)   | 2.48 (2.23–2.76)  | <0.001  |
| Model Set 2                | 0.44 (0.41–0.46)  | 0.65 (0.63–0.68)   | 2.58 (2.32–2.87)  | <0.001  |
| Model Set 2+CKD            | 0.44 (0.42–0.46)  | 0.64 (0.61–0.66)   | 2.40 (2.16–2.67)  | <0.001  |
| Model Set 3a               | 0.44 (0.42–0.46)  | 0.64 (0.61–0.67)   | 2.42 (2.17–2.70)  | <0.001  |
| <b>T1DM (Ref. no T2DM)</b> |                   |                    |                   |         |
| Model Set 0                | 0.55 (0.53–0.57)  | 0.60 (0.57–0.63)   | 1.25 (1.13, 1.38) | <0.001  |
| Model Set 1                | 0.55 (0.52–0.57)  | 0.64 (0.61–0.67)   | 1.47 (1.32–1.64)  | <0.001  |
| Model Set 2                | 0.55 (0.53–0.57)  | 0.65 (0.63–0.68)   | 1.58 (1.43–1.76)  | <0.001  |
| Model Set 2 + CKD          | 0.55 (0.53–0.57)  | 0.64 (0.62–0.67)   | 1.52 (1.37–1.69)  | <0.001  |
| Model Set 2 + DKA          | 0.55 (0.53–0.57)  | 0.56 (0.53–0.59)   | 1.05 (0.95–1.16)  | 0.369   |
| Model Set 3b               | 0.55 (0.53–0.57)  | 0.57 (0.54–0.60)   | 1.09 (0.98–1.21)  | 0.098   |
| <b>Death</b>               |                   |                    |                   |         |
| <b>T1DM (Ref. no DM)</b>   |                   |                    |                   |         |
| Model Set 0                | 0.12 (0.12–0.13)  | 0.10 (0.08–0.11)   | 0.76 (0.66–0.89)  | <0.001  |
| Model Set 1*               | 0.12 (0.12–0.13)  | 0.17 (0.15–0.19)   | 1.54 (1.31–1.81)  | <0.001  |
| Model Set 2                | 0.12 (0.12–0.12)  | 0.17 (0.15–0.19)   | 1.51 (1.29–1.77)  | <0.001  |
| Model Set 2+CKD            | 0.12 (0.12–0.13)  | 0.15 (0.13–0.17)   | 1.31 (1.12–1.54)  | <0.001  |
| Model Set 3a               | 0.12 (0.12–0.12)  | 0.15 (0.13–0.17)   | 1.32 (1.12–1.55)  | 0.001   |
| <b>T1DM (Ref. no T2DM)</b> |                   |                    |                   |         |
| Model Set 0                | 0.19 (0.18–0.19)  | 0.10 (0.08–0.11)   | 0.47 (0.40–0.54)  | <0.001  |
| Model Set 1                | 0.18 (0.18–0.19)  | 0.18 (0.16–0.21)   | 1.00 (0.86–1.17)  | 0.975   |
| Model Set 2                | 0.18 (0.18–0.19)  | 0.18 (0.16–0.20)   | 0.98 (0.84–1.14)  | 0.763   |
| Model Set 2+CKD            | 0.18 (0.18–0.19)  | 0.17 (0.15–0.19)   | 0.92 (0.78–1.07)  | 0.259   |
| Model Set 2+DKA            | 0.18 (0.18–0.19)  | 0.16 (0.14–0.18)   | 0.81 (0.69–0.95)  | 0.009   |
| Model Set 3b               | 0.18 (0.18–0.19)  | 0.16 (0.14–0.18)   | 0.80 (0.68–0.94)  | 0.007   |

Abbreviations: CI = confidence interval; CKD = chronic kidney disease; COVID-19 = coronavirus disease 2019; DKA = diabetic ketoacidosis; DM = diabetes; ICU/MV= intensive care unit/mechanical ventilation; OR = odds ratio; Ref = reference; T1DM = type 1 diabetes mellitus; T2DM = type 2 diabetes mellitus. Each estimate represents results from a separate model, clustered on hospital ID and controlling for age, sex, race/ethnicity (Model Set 1); and additionally for payer type, Census region, urbanicity of hospitals, and admission month (Model Set 2); underlying medical conditions (hypertension, disorders of lipid metabolism, obesity, CKD, coronary atherosclerosis and other heart disease, COPD, neoplasms) (Model Set 3a); and DKA (Model Set 3b).

**Table S3.** Adjusted absolute risk differences and risk ratios for intensive care unit/mechanical ventilation among 269,674 patients hospitalized with COVID-19 in the United States, March–November, 2020 using the full modified Klompas algorithm.

|                            | RD                  | p-value | RR               | p-value |
|----------------------------|---------------------|---------|------------------|---------|
| <b>ICU/MV</b>              |                     |         |                  |         |
| <b>T1DM (Ref. no DM)</b>   |                     |         |                  |         |
| Model Set 1                | 0.23 (0.21,0.26)    | <0.001  | 1.53 (1.46,1.60) | <0.001  |
| <b>T1DM (Ref. no T2DM)</b> |                     |         |                  |         |
| Model Set 1                | 0.11 (0.09,0.14)    | <0.001  | 1.20 (1.16,1.25) | <0.001  |
| Model Set 2 + DKA          | 0.02 (-0.00,0.05)   | 0.069   | 1.04 (1.00,1.09) | 0.064   |
| <b>Death</b>               |                     |         |                  |         |
| <b>T1DM (Ref. no DM)</b>   |                     |         |                  |         |
| Model Set 1                | 0.05 (0.03,0.07)    | <0.001  | 1.42 (1.25,1.61) | <0.001  |
| <b>T1DM (Ref. no T2DM)</b> |                     |         |                  |         |
| Model Set 1                | 0.00 (-0.02,0.03)   | 0.914   | 1.01 (0.89,1.15) | 0.914   |
| Model Set 2+DKA            | -0.03 (-0.05,-0.01) | 0.005   | 1.23 (1.04,1.45) | 0.013   |

Abbreviations: CI = confidence interval; COVID-19 = coronavirus disease 2019; DKA = diabetic ketoacidosis; DM = diabetes; ICU/MV= intensive care unit/mechanical ventilation; RD = risk difference; Ref = reference; RR = risk ratio; T1DM = type 1 diabetes mellitus; T2DM = type 2 diabetes mellitus. Each estimate represents results from a separate model, clustered on hospital ID and controlling for age, sex, race/ethnicity (Model Set 1); and additionally for payer type, Census region, urbanicity of hospitals, admission month, and DKA (Model Set 2+DKA).

**Figure S1.** Adjusted absolute risk differences for intensive care unit/mechanical ventilation and mortality among 269,674 patients hospitalized with COVID-19 in the United States, discharged March–November 2020.

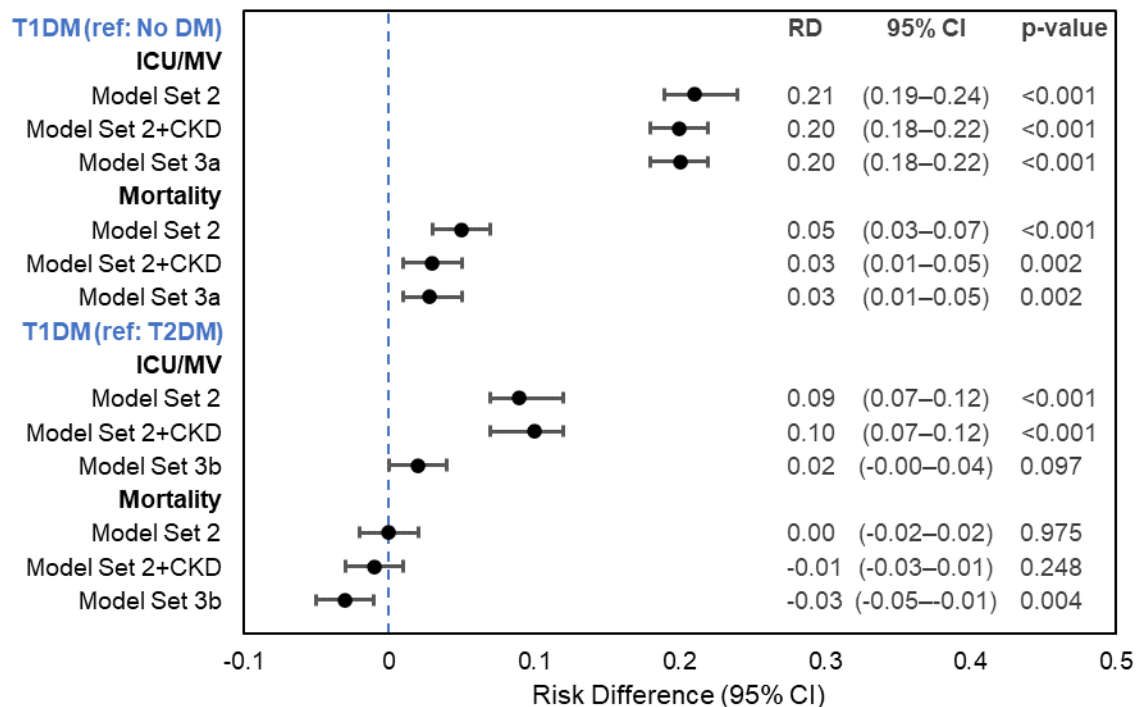

Abbreviations: CKD = chronic kidney disease; COVID-19 = coronavirus disease 2019; DKA = diabetic ketoacidosis; DM = diabetes mellitus; ICU/MV= intensive care unit/mechanical ventilation; RD = risk difference; Ref = reference; T1DM = type 1 diabetes mellitus; T2DM = type 2 diabetes mellitus. Each estimate represents results from a separate model, clustered on hospital ID and controlling for age, sex, race/ethnicity, payer type, Census region, urbanicity of hospitals, and admission month (Model Set 2); underlying medical conditions (hypertension, disorders of lipid metabolism, obesity, CKD, coronary atherosclerosis and other heart disease, COPD, neoplasms) (Model Set 3a); and DKA (Model Set 3b).

**Figure S2.** Adjusted absolute risk ratios for intensive care unit/mechanical ventilation and mortality among 269,674 patients hospitalized with COVID-19 in the United States, discharged March–November 2020.

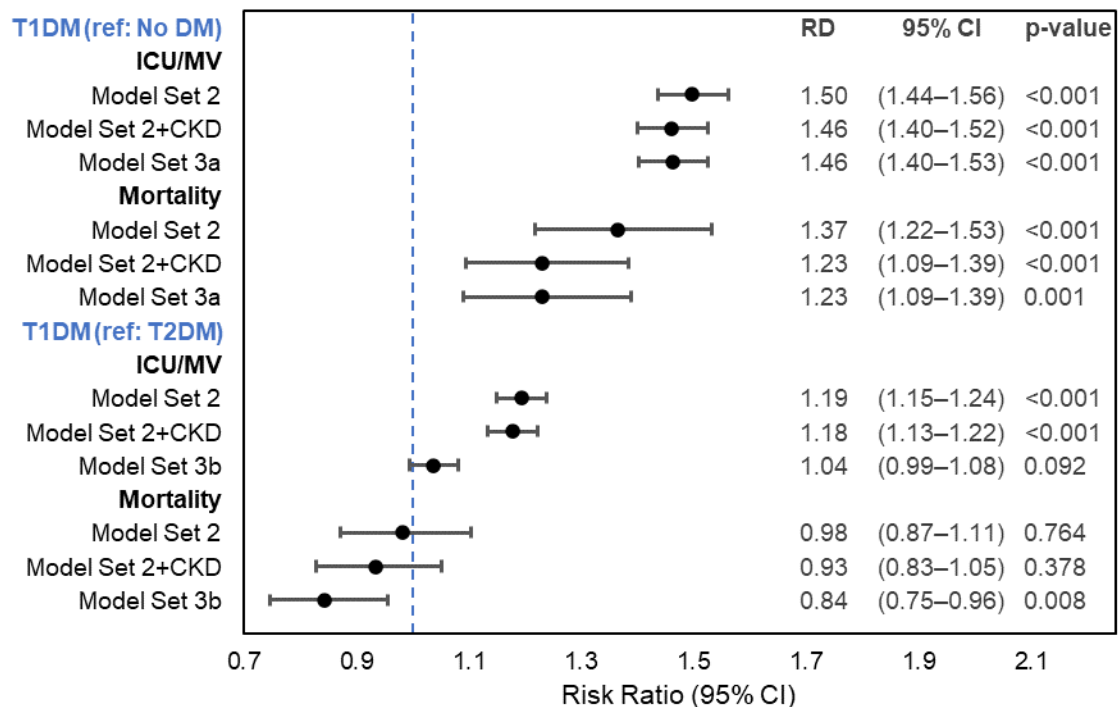

Abbreviations: COVID-19 = coronavirus disease 2019; DM = diabetes mellitus; ICU/MV= intensive care unit/mechanical ventilation; Ref = reference; RR = risk ratio; T1DM = type 1 diabetes mellitus; T2DM = type 2 diabetes mellitus. Each estimate represents results from a separate model, clustered on hospital ID and controlling for age, sex, race/ethnicity, payer type, Census region, urbanicity of hospitals, and admission month (Model Set 2); underlying medical conditions (hypertension, disorders of lipid metabolism, obesity, CKD, coronary atherosclerosis and other heart disease, COPD, neoplasms) (Model Set 3a); and DKA (Model Set 3b).
